# Supplementary material for: Inositol 1,4,5‐Trisphosphate Receptors in Endothelial Cells Play an Essential Role in Vasodilation and Blood Pressure Regulation
Source: PubMed Central journal article supplement — J Am Heart Assoc. 2019 Feb 13;8(4):e011704. doi: 10.1161/JAHA.118.011704 (PMC6405661; doi:10.1161/jaha.118.011704), 2019-02-13
Supplement: JAH3-8-e011704-s001.pdf [file JAH3-8-e011704-s001.pdf]

# **SUPPLEMENTAL MATERIAL**

**Table S1. primers sequences for RT-PCR.**

| Gene          | Forward primer (5'-3')    | Reverse primer (5'-3')    |
|---------------|---------------------------|---------------------------|
| <i>lpr1</i>   | CTCTGTATGCGGAGGGATCTAC    | GCGGAGTATCGATTCATAGGAC    |
| <i>lpr2</i>   | CTTCCTCTACATTGGGGACATC    | GGCAGAGTATCGATTCATAGGG    |
| <i>lpr3</i>   | AGCCAAGCAGACTAAACAGGAC    | GCCGCTTGTTACAGTTAAGTA     |
| <i>NOS3</i>   | TACGCACCCAGAGCTTTTCT      | CTTGGTCAACCGAACGAAGT      |
| <i>CHRM1</i>  | TGACAGGCAACCTGCTGGTGCT    | AATCATCAGAGCTGCCCTGCGG    |
| <i>CHRM2</i>  | CGGACCACAAAATGGCAGGCAT    | CCATCACCACCAGGCATGTTGTTGT |
| <i>CHRM3</i>  | CCTCTTGAAGTGCTGCGTTCTGACC | TGCCAGGAAGCCAGTCAAGAATGC  |
| <i>CHRM4</i>  | TGTGGTGAGCAATGCCTCTGTCATG | GGCTTCATCAGAGGGCTCTTGAGGA |
| <i>CHRM5</i>  | ACCACTGACATACCGAGCCAAGCG  | TTCCCGTTGTTGAGGTGCTTCTACG |
| <i>CHRNA7</i> | GTAACCATGCGCCGTAGG        | CCGAGGCTTGTGCTGAC         |
| <i>Gapdh</i>  | TGGCCTTCCGTGTTCCCTAC      | GAGTTGCTGTTGAAGTCGCA      |

**Figure S1. Endothelial cell-specific gene deletion in adult mice by Pdgfb-iCreER.**

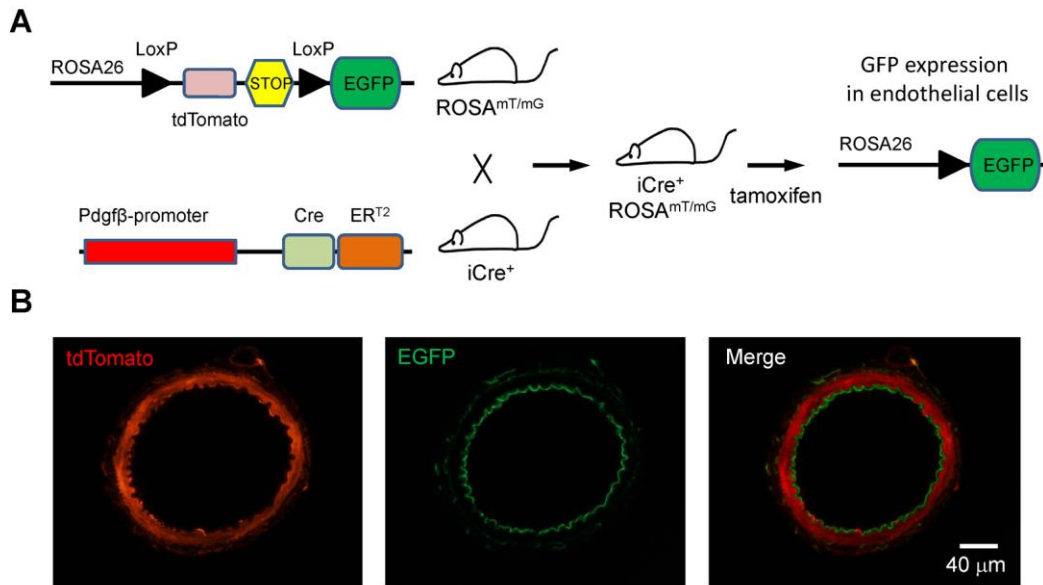

The Pdgfb-iCreER ( $iCre^+$ ) mice were crossed with the  $ROSA^{mT/mG}$  reporter mice to generate the  $iCre^+ROSA^{mT/mG}$  mice. Administration of tamoxifen in adult  $iCre^+ROSA^{mT/mG}$  mice led to expression of cell membrane-localized EGFP in endothelial cells, while non-endothelial cells expressed cell membrane-localized tdTomato. **(A)** Schematic diagram demonstrating the crossing strategy and the induction of EGFP expression. **(B)** Confocal fluorescent imaging showing the localization of EGFP and tdTomato in the cross-section of the mesenteric artery isolated from  $iCre^+ROSA^{mT/mG}$  mice after tamoxifen administration. Scale bar, 40  $\mu m$ .

**Figure S2. Deletion of IP3R1 by Tie2-Cre in mice did not alter blood pressure and vasodilation.**

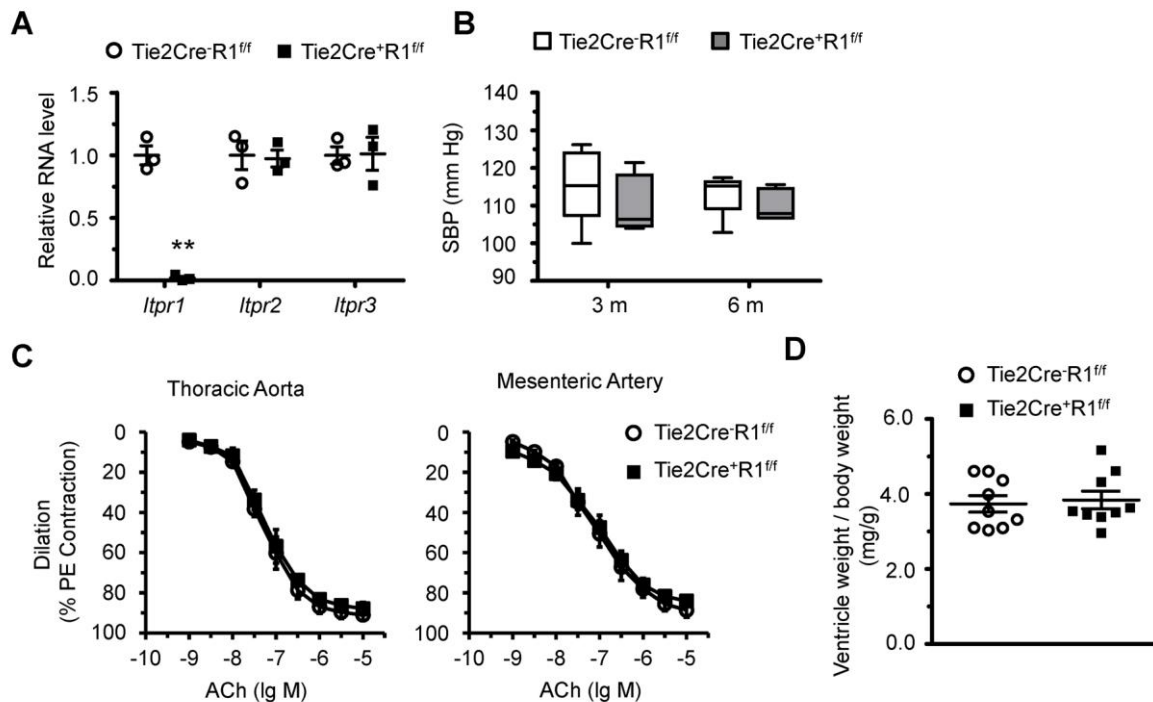

The constitutively active Tie2-Cre instead of the inducible Pdgfb-iCreER was used to delete IP<sub>3</sub>R1 in endothelial cells from as early as the embryonic stage. **(A)** Quantitative RT-PCR analysis of the expression of 3 IP<sub>3</sub>R subtypes in isolated endothelial cells from Tie2-Cre<sup>-</sup>R1<sup>ff</sup> and Tie2-Cre<sup>+</sup>R1<sup>ff</sup> mice. *n* = 3 (with endothelial cells from 3 mice pooled as one sample) per group. Significance was determined by the 2-tailed, unpaired Student's *t* test. \*\**P* < 0.01 versus Tie2-Cre<sup>-</sup>R1<sup>ff</sup> mice. Data are presented as mean ± SEM. **(B)** Systolic blood pressure (SBP) were measured at the ages of 3 months and 6 months using the tail cuff system, respectively. *n* = 5-8 mice per group. Significance was determined by 2-way ANOVA analysis with Bonferroni post-hoc test. **(C)** Vascular reactivity in response to ACh in aortas and mesenteric arteries. The vessels were pre-constricted by 10 μM phenylephrine (PE) and the vasorelaxing effects of ACh were presented as a percentage of PE-induced contraction. *n* = 6 mice per group. Significance was determined by 2-way ANOVA analysis with Bonferroni post-hoc test. **(D)** The ratio of ventricle weight to body weight was comparable between Tie2-Cre<sup>-</sup>R1<sup>ff</sup> and Tie2-Cre<sup>+</sup>R1<sup>ff</sup> mice at the age of 6 months. *n* = 9 mice per group. Significance was determined by 2-tailed, unpaired Student's *t* test.

**Figure S3. Mouse breeding strategy and measurement of vascular contractility in control and ECTKO mice.**

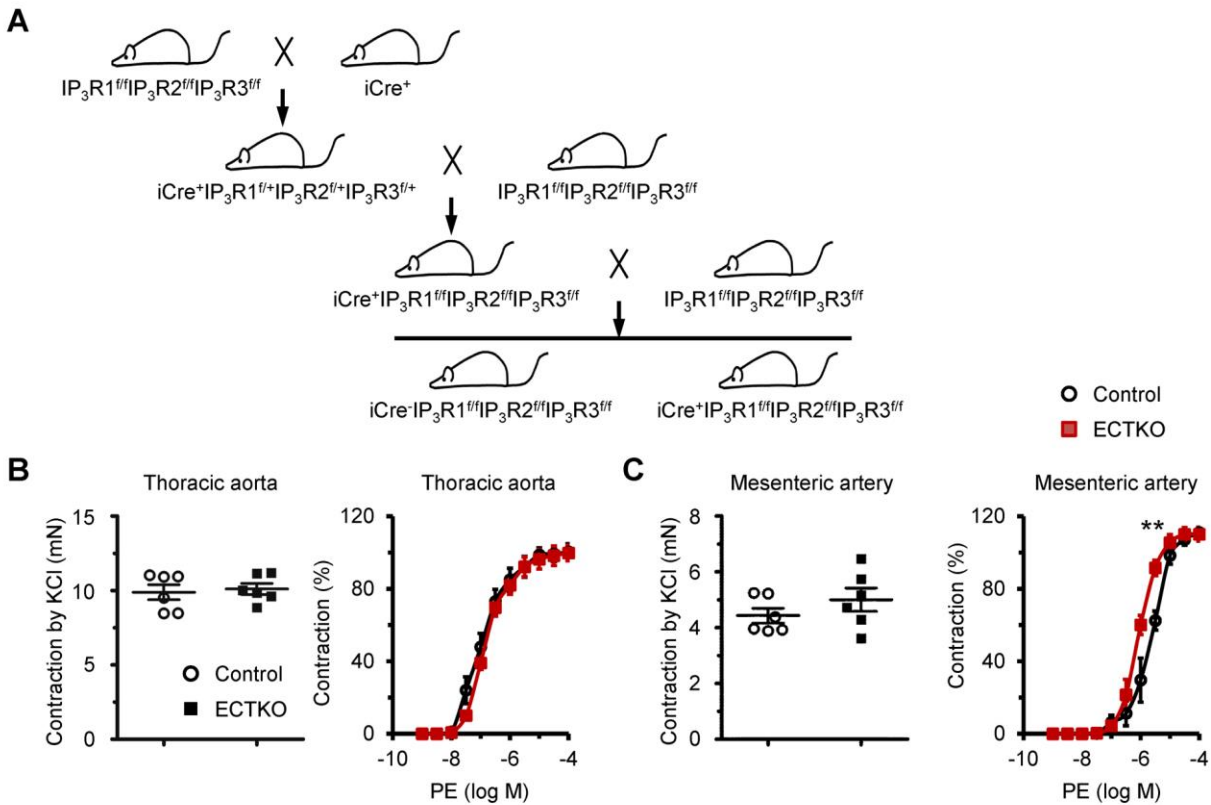

**(A)** Schematic diagram showing the mouse breeding strategy to generate  $iCre^{+}IP_3R1^{ff}IP_3R2^{ff}IP_3R3^{ff}$  mice. **(B)** Reference contraction induced by high potassium (100mM) and the dose-dependent contractile response to phenylephrine (PE) in control and ECTKO aortas.  $n = 6$  per group. **(C)** Reference contraction induced by high potassium (100mM) and the dose-dependent contractile response to phenylephrine (PE) in control and ECTKO mesenteric arteries.  $n = 6$  per group. For all dose-response curves, data were expressed as a percentage of the peak of  $K^{+}$ -induced contraction, and significance was determined by 2-tailed, unpaired Student's  $t$  test or 2-way ANOVA analysis with Bonferroni post-hoc test.  $**P < 0.01$  versus control. Error bars represent mean  $\pm$  SEM.
